# Supplementary material
Source: PubMed Central journal article supplement (PMC3553684)
Supplement: AAC.01083-12_zac999101543so1.pdf [file AAC.01083-12_zac999101543so1.pdf]

Table S1: Standard dosage regimens for broad-spectrum  $\beta$ -lactams

| <b>Antibiotic</b>       | <b>Creatinine clearance (ml/minute)</b> |              |              |             |
|-------------------------|-----------------------------------------|--------------|--------------|-------------|
|                         | <b>&gt; 80</b>                          | <b>80-50</b> | <b>50-10</b> | <b>CRRT</b> |
| Cefepime                | 2gTID                                   | 2gBID        | 2gBID        | 2gTID       |
| Ceftazidime             | 2gTID                                   | 2gTID        | 2gBID        | 2gTID       |
| Piperacillin-tazobactam | 4gQID                                   | 4gQID        | 4gTID        | 4gQID       |
| Meropenem               | 1gTID                                   | 1gBID        | 1gBID        | 1gTID       |
